# Supplementary material for: HPLC Study of Product Formed in the Reaction of NBD-Derived Fluorescent Probe with Hydrogen Sulfide, Cysteine, N-acetylcysteine, and Glutathione
Source: MDPI journal article supplement (doi:10.3390/molecules27238305), 2022-11-28
Supplement: s1 [file s1]

## Supplementary Materials

### HPLC Study of Product Formed in the Reaction of NBD-Derived Fluorescent Probe with Hydrogen Sulfide, Cysteine, *N*-acetylcysteine, and Glutathione

Daniel Słowiński <sup>1</sup>, Małgorzata Świerczyńska <sup>1</sup>, Jarosław Romański <sup>2</sup> and Radosław Podsiadły <sup>1,\*</sup>

<sup>1</sup> Institute of Polymer and Dye Technology, Faculty of Chemistry, Lodz University of Technology, Stefanowskiego 16, 90-537, Lodz, Poland

<sup>2</sup> Department of Organic and Applied Chemistry, Faculty of Chemistry, University of Lodz, Tamka 12, 91-403, Lodz, Poland

\* Correspondence: [radoslaw.podsiadly@p.lodz.pl](mailto:radoslaw.podsiadly@p.lodz.pl)

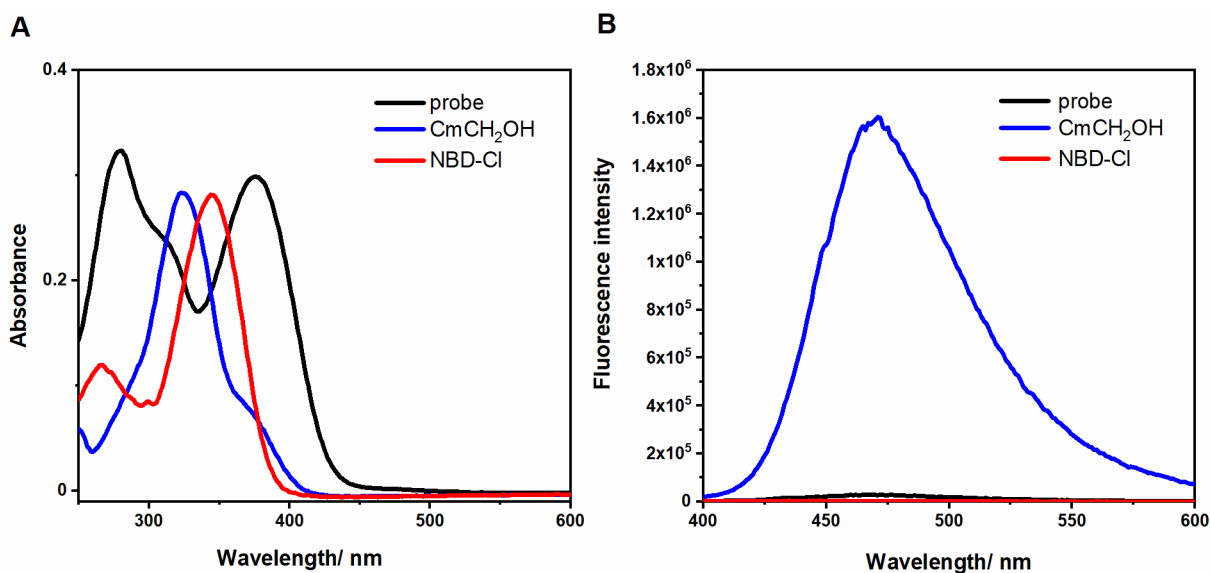

**Figure S1.** (A) UV-Vis absorption and (B) emission spectra of the **NBD-O-CmCH<sub>2</sub>OH** probe, **CmCH<sub>2</sub>OH**, and **NBD-Cl** recorded in phosphate buffer (0.1 M, pH 7.4) containing MeCN (10%).  $\lambda_{\text{ex}}$ =320 nm, slites 1.0/1.0 nm.

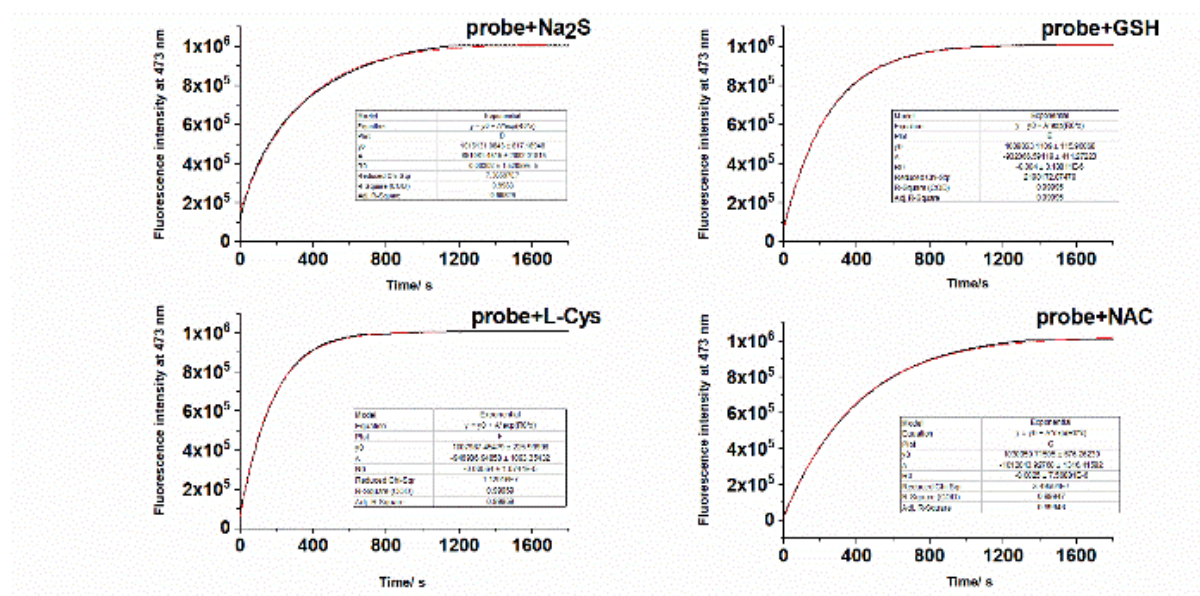

**Figure S2.** Time-dependent fluorescence intensity changes of NBD-O-CmCH<sub>2</sub>OH (5 μM) at 473 nm when treated with various thiol species (50 μM) in PB buffer.

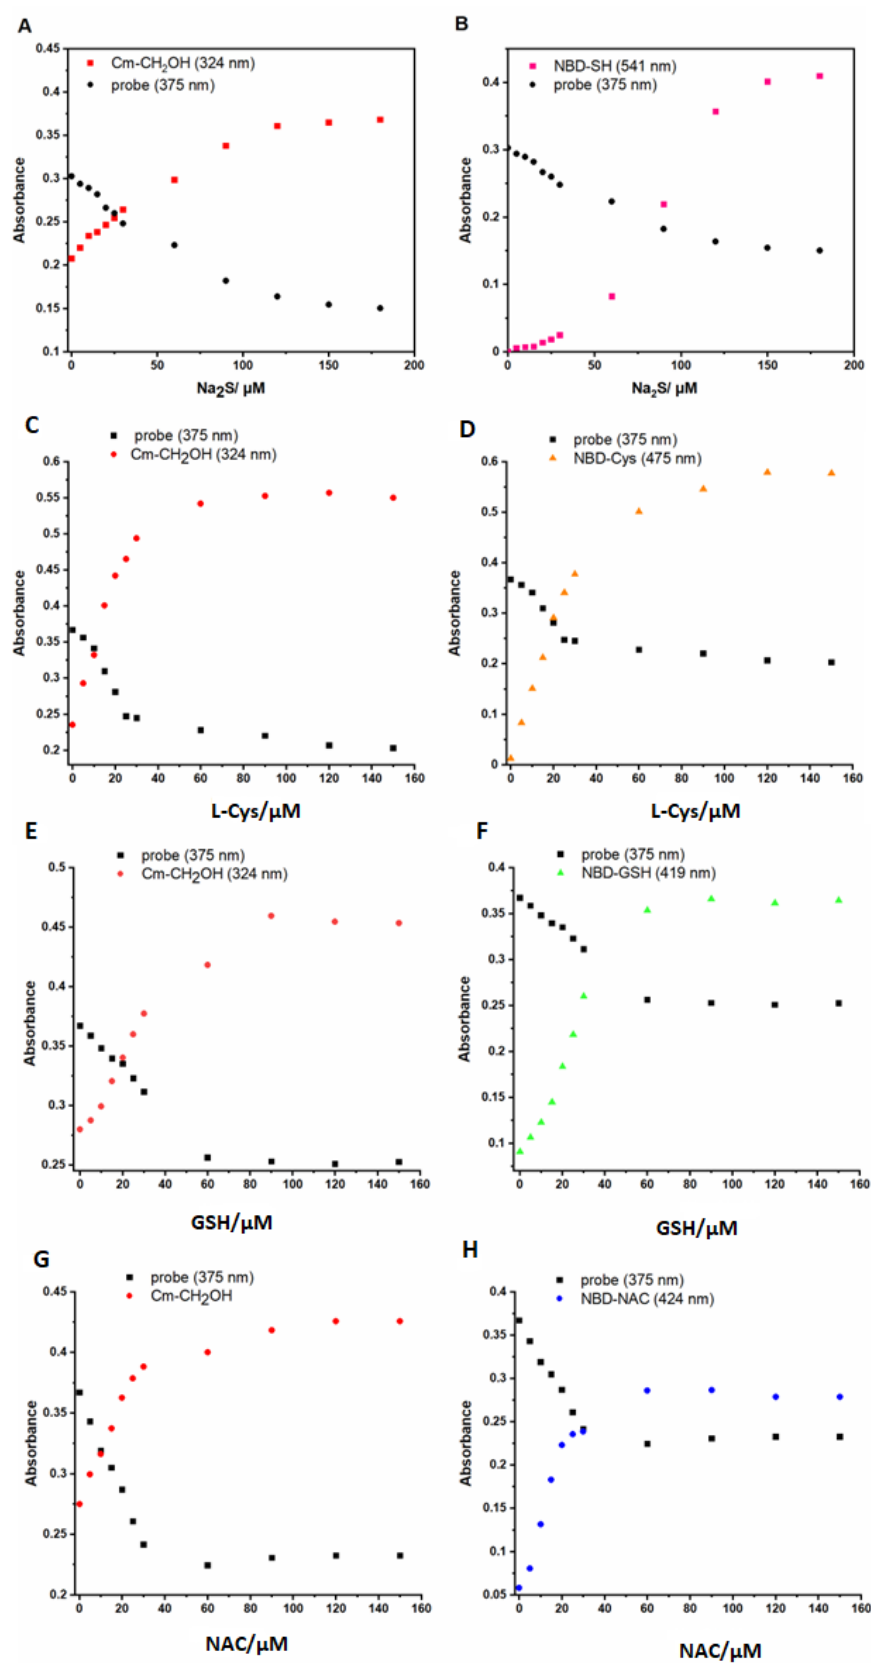

**Figure S3.** Changes in the characteristic absorption bands during the reaction between the **NBD-O-CmCH<sub>2</sub>OH** probe ( 30  $\mu\text{M}$ ) and (A,B)  $\text{Na}_2\text{S}$ , (C,D) L-Cys, (E,F) GSH (G,H) NAC.

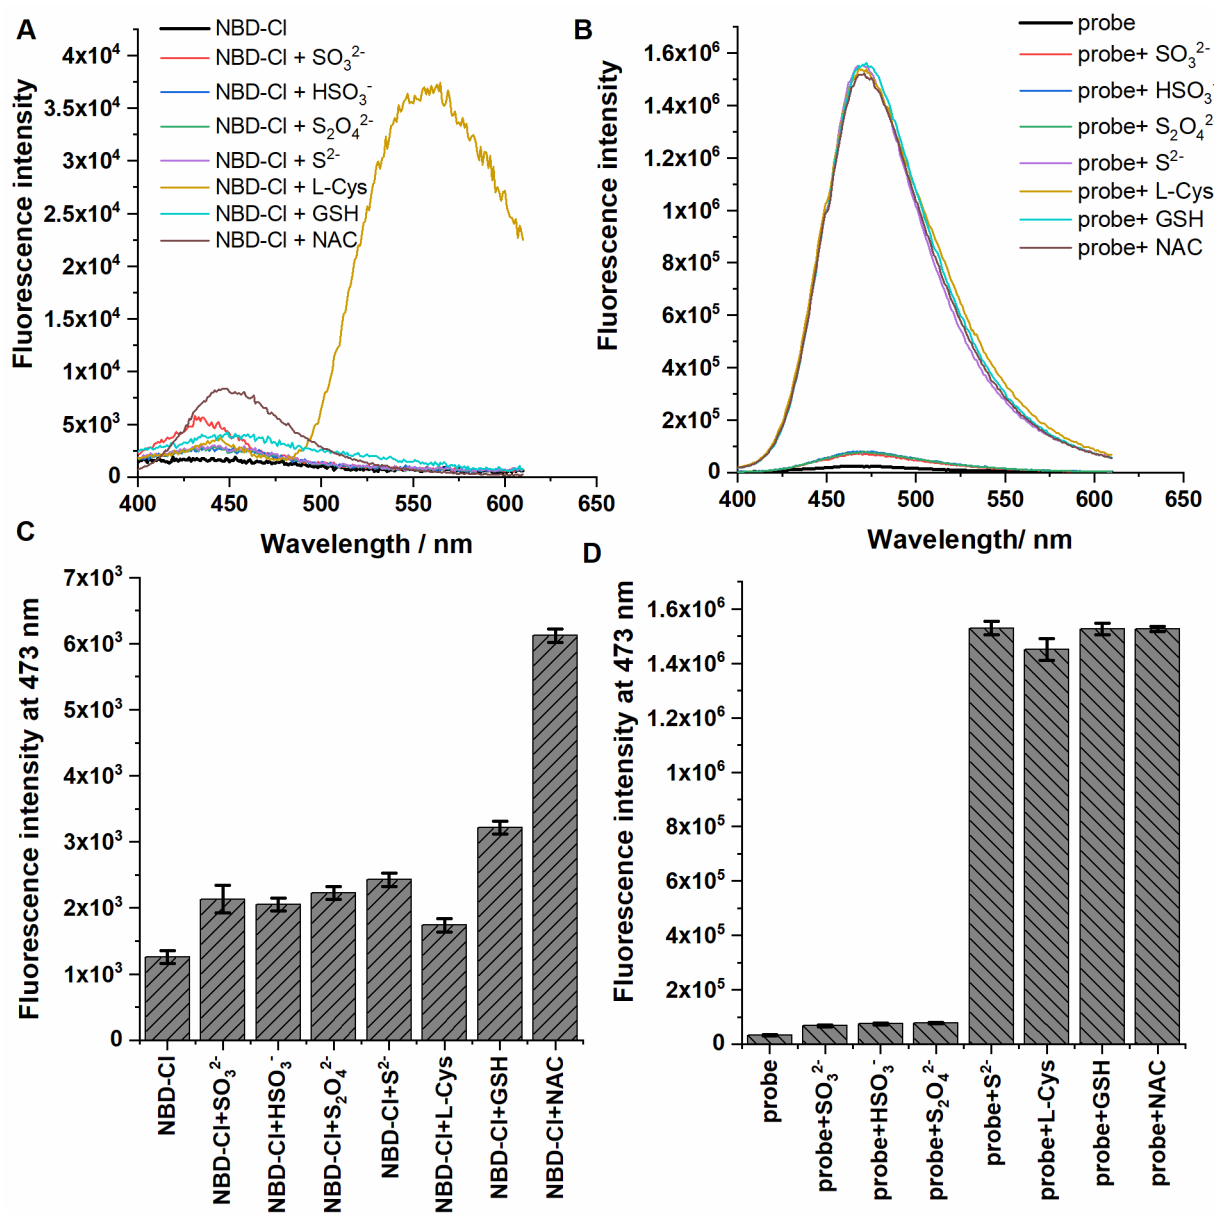

**Figure S4.** The fluorescence intensity changes of (A,C) NBD-Cl and (B,D) probe NBD-O-CmCH<sub>2</sub>OH (7.5  $\mu\text{M}$ ) upon the addition of sulfur species (37.5  $\mu\text{M}$  for each) in MeCN-PB (1:9, v/v, pH 7.4).

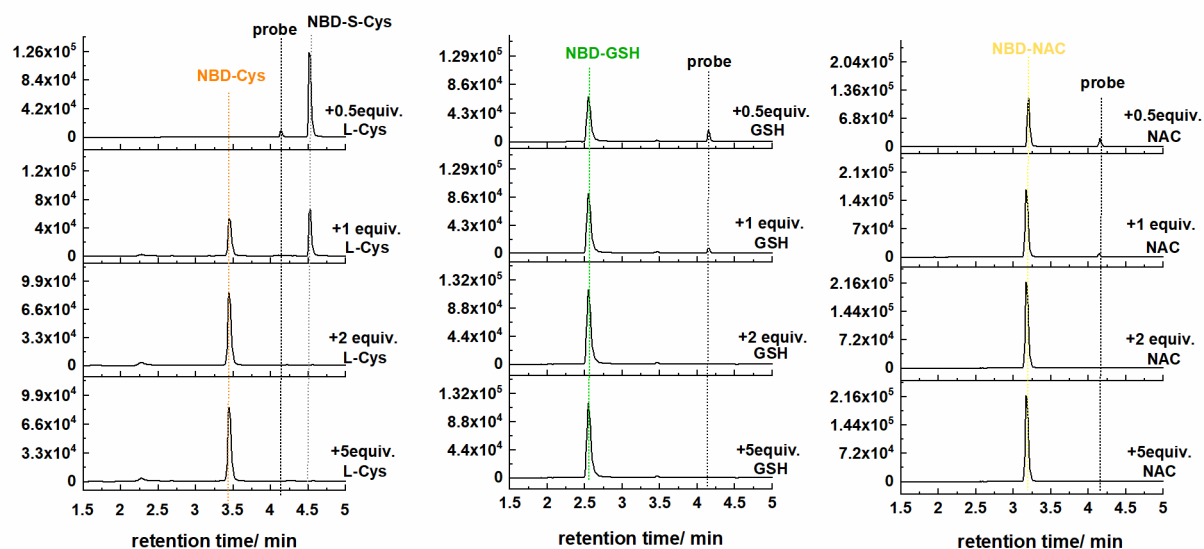

**Figure S5.** HPLC chromatogram of the reaction mixtures of **NBD-O-CmCH<sub>2</sub>OH** (60  $\mu$ M) with (A) L-Cys (30 – 300  $\mu$ M), (B) GSH 30– 300  $\mu$ M, (C) NAC 30 – 300  $\mu$ M after 15 min incubation. The traces were collected using an absorption detector set at 420 nm.

**Table 1.** Comparison of **NBD-O-CmCH<sub>2</sub>OH** with the fluorescent probes previously reported.

| Structures                                                                                                            | Medium                 | Detection targets | $\lambda_{em}$ (nm) | $\lambda_{ex}$ (nm) | Response time (min) | LOD ( $\mu$ M) | Ref.     |
|-----------------------------------------------------------------------------------------------------------------------|------------------------|-------------------|---------------------|---------------------|---------------------|----------------|----------|
| 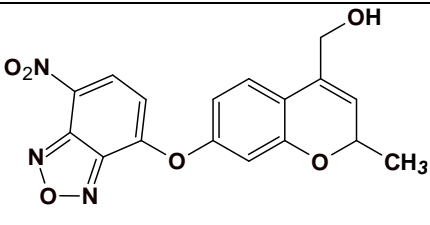<br><b>NBD-O-CmCH<sub>2</sub>OH</b> | MeCN:PB<br>(1:9, v/v)  | Cys               | 320                 | 473                 | 15                  | 0.14           | Our work |
|                                                                                                                       |                        | GSH               |                     |                     |                     | 0.06           |          |
|                                                                                                                       |                        | H <sub>2</sub> S  |                     |                     |                     | 0.03           |          |
|                                                                                                                       |                        | NAC               |                     |                     |                     | 0.03           |          |
| <br><b>FHC-O-NBD</b>                | MeCN:PBS<br>(6:4, v/v) | Cys               | 340                 | 486                 | 20                  | 0.11           | [S1]     |
|                                                                                                                       |                        | GSH               |                     |                     | 120                 | 0.79           |          |
|                                                                                                                       |                        | H <sub>2</sub> S  |                     |                     | ND*                 | 0.42           |          |
|                                                                                                                       |                        | NAC               |                     |                     | ND*                 | ND*            |          |

|                                                                                                          |                                                                                                                                                                                                                                                                                                                                                                                             |
|----------------------------------------------------------------------------------------------------------|---------------------------------------------------------------------------------------------------------------------------------------------------------------------------------------------------------------------------------------------------------------------------------------------------------------------------------------------------------------------------------------------|
| 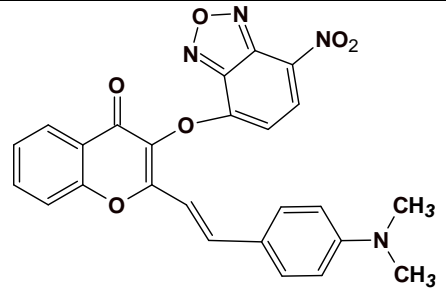 <p><b>NBD-OF</b></p>    | <div>MeCN:PBS</div> <div>(3:7, v/v)</div> <div>488</div> <div> <div>Cys</div> <div>GSH</div> <div>H<sub>2</sub>S</div> <div>NAC</div> </div> <div> <div>545,621</div> <div>621</div> <div>ND*</div> <div>ND*</div> </div> <div> <div>60</div> <div>120</div> <div>ND*</div> <div>ND*</div> </div> <div> <div>2.1</div> <div>6.4</div> <div>ND*</div> <div>ND*</div> </div> <div>[S2]</div>  |
|  <p><b>SNARF-NBD</b></p> | <div>MeCN:PBS</div> <div>(3:7, v/v)</div> <div>435</div> <div> <div>Cys</div> <div>GSH</div> <div>H<sub>2</sub>S</div> <div>NAC</div> </div> <div> <div>543</div> <div>543</div> <div>624</div> <div>ND*</div> </div> <div> <div>10</div> <div>15</div> <div>ND*</div> <div>ND*</div> </div> <div> <div>0.05</div> <div>0.06</div> <div>0.06</div> <div>ND*</div> </div> <div>[S3]</div>    |
|  <p><b>BMNO</b></p>     | <div>MeCN:HEPES</div> <div>(1:1, v/v)</div> <div>330</div> <div> <div>Cys</div> <div>GSH</div> <div>H<sub>2</sub>S</div> <div>NAC</div> </div> <div> <div>405</div> <div>ND*</div> </div> <div> <div>1.8</div> <div>1.6</div> <div>ND*</div> <div>ND*</div> </div> <div>[S4]</div>                                                                                                          |
|  <p><b>RED-NBD</b></p> | <div>MeCN:PB</div> <div>(3:7, v/v)</div> <div>450</div> <div> <div>Cys</div> <div>GSH</div> <div>H<sub>2</sub>S</div> <div>NAC</div> </div> <div> <div>560, 630</div> <div>630</div> <div>ND*</div> <div>ND*</div> </div> <div> <div>10</div> <div>10</div> <div>ND*</div> <div>ND*</div> </div> <div> <div>0.02</div> <div>0.03</div> <div>ND*</div> <div>ND*</div> </div> <div>[S5]</div> |
|  <p><b>NC-NBD</b></p>  | <div>DMF:PBS</div> <div>(1:9, v/v)</div> <div>420</div> <div> <div>Cys</div> <div>GSH</div> <div>H<sub>2</sub>S</div> <div>NAC</div> </div> <div> <div>520</div> <div>ND*</div> <div>ND*</div> <div>ND*</div> </div> <div> <div>2</div> <div>ND*</div> <div>ND*</div> <div>ND*</div> </div> <div> <div>0.43</div> <div>0.36</div> <div>ND*</div> <div>ND*</div> </div> <div>[S6]</div>      |

|                                                                                                        |                                                                                                                                                                                                                                                                                                                                                                                                                                                          |  |  |  |  |  |  |
|--------------------------------------------------------------------------------------------------------|----------------------------------------------------------------------------------------------------------------------------------------------------------------------------------------------------------------------------------------------------------------------------------------------------------------------------------------------------------------------------------------------------------------------------------------------------------|--|--|--|--|--|--|
| 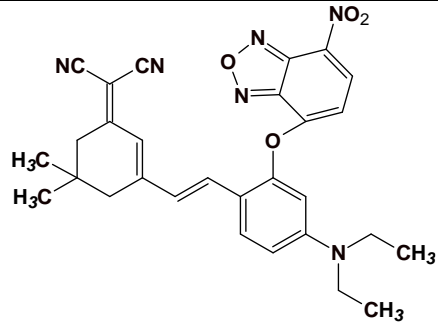 <p><b>NIR-NBD</b></p> | <div> <div>DMF:PBS<br/>(4:6, v/v)</div> <div> <div>Cys</div> <div>GSH</div> <div>H<sub>2</sub>S</div> <div>NAC</div> </div> <div> <div>588</div> <div>756</div> </div> <div> <div>15</div> <div>8</div> <div>ND*</div> <div>ND*</div> </div> <div> <div>0.16</div> <div>0.56</div> <div>ND*</div> <div>ND*</div> </div> <div>[S7]</div> </div>                                                                                                           |  |  |  |  |  |  |
|  <p><b>NJB</b></p>     | <div> <div>MeCN:PBS<br/>(1:1, v/v)</div> <div> <div>Cys</div> <div>GSH</div> <div>H<sub>2</sub>S</div> <div>NAC</div> </div> <div> <div>478</div> <div>ND*</div> <div>546</div> <div>ND*</div> </div> <div> <div>553</div> <div>ND*</div> <div>604</div> <div>ND*</div> </div> <div> <div>30</div> <div>ND*</div> <div>180</div> <div>ND*</div> </div> <div> <div>0.06</div> <div>ND*</div> <div>0.08</div> <div>ND*</div> </div> <div>[S8]</div> </div> |  |  |  |  |  |  |

\*ND-no determined

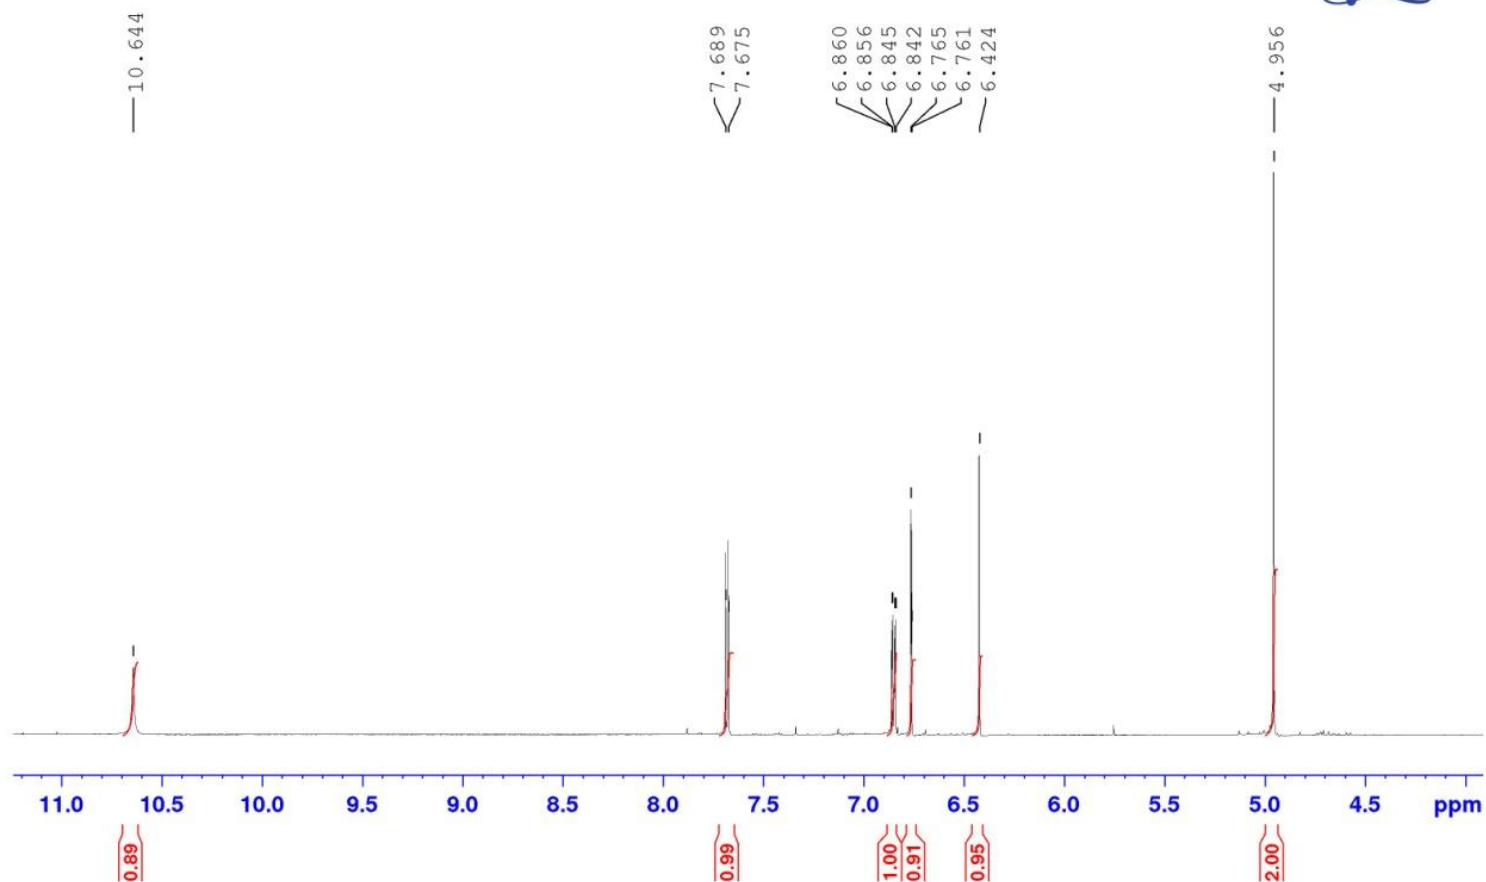

**Figure S6.**  $^1\text{H}$  NMR spectrum of  $\text{CmCH}_2\text{Cl}$



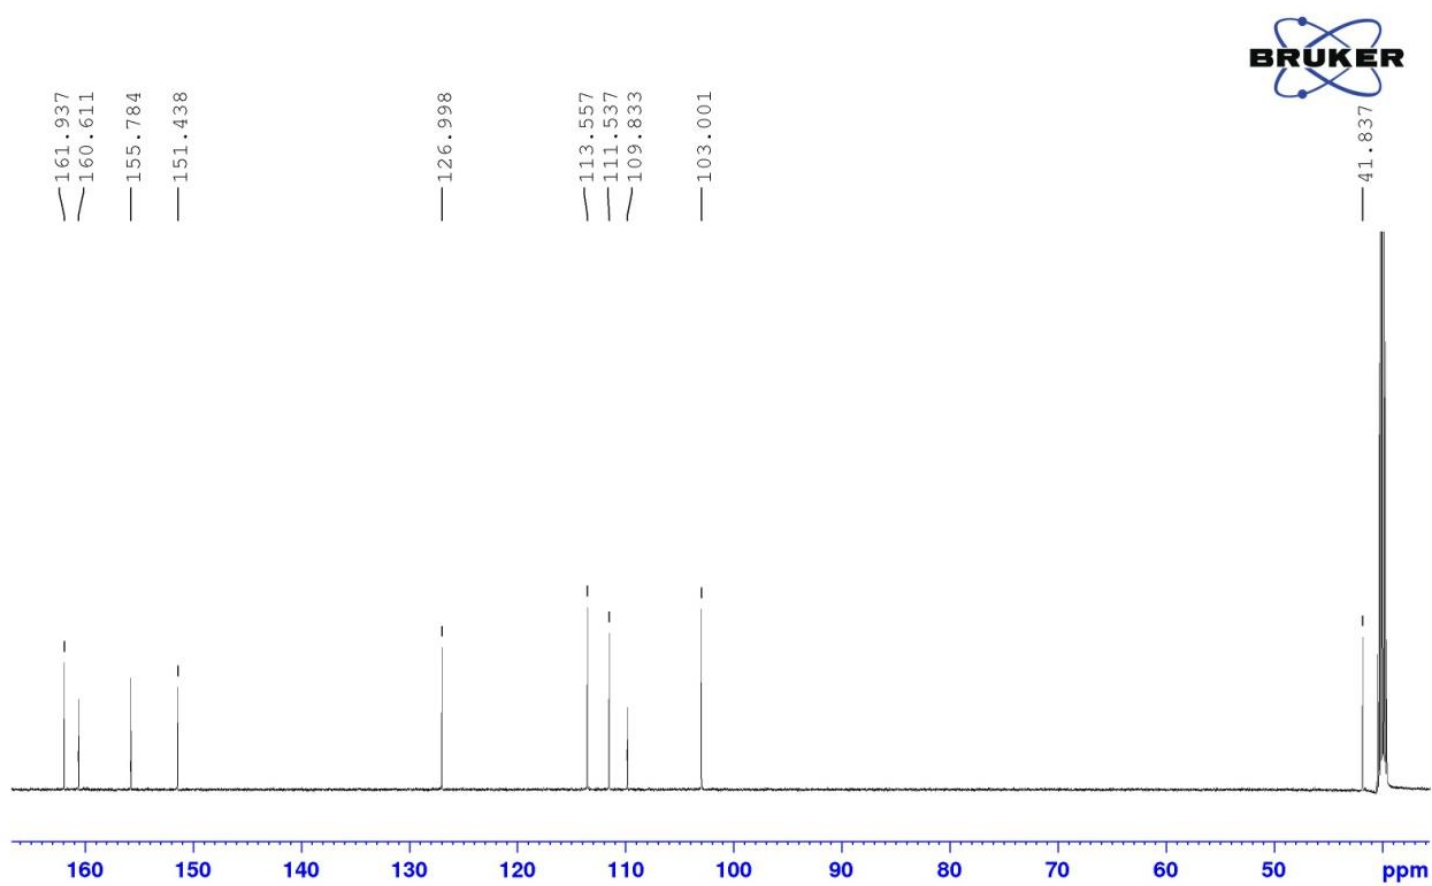

**Figure S7.** <sup>13</sup>C NMR spectrum of **CmCH<sub>2</sub>Cl**

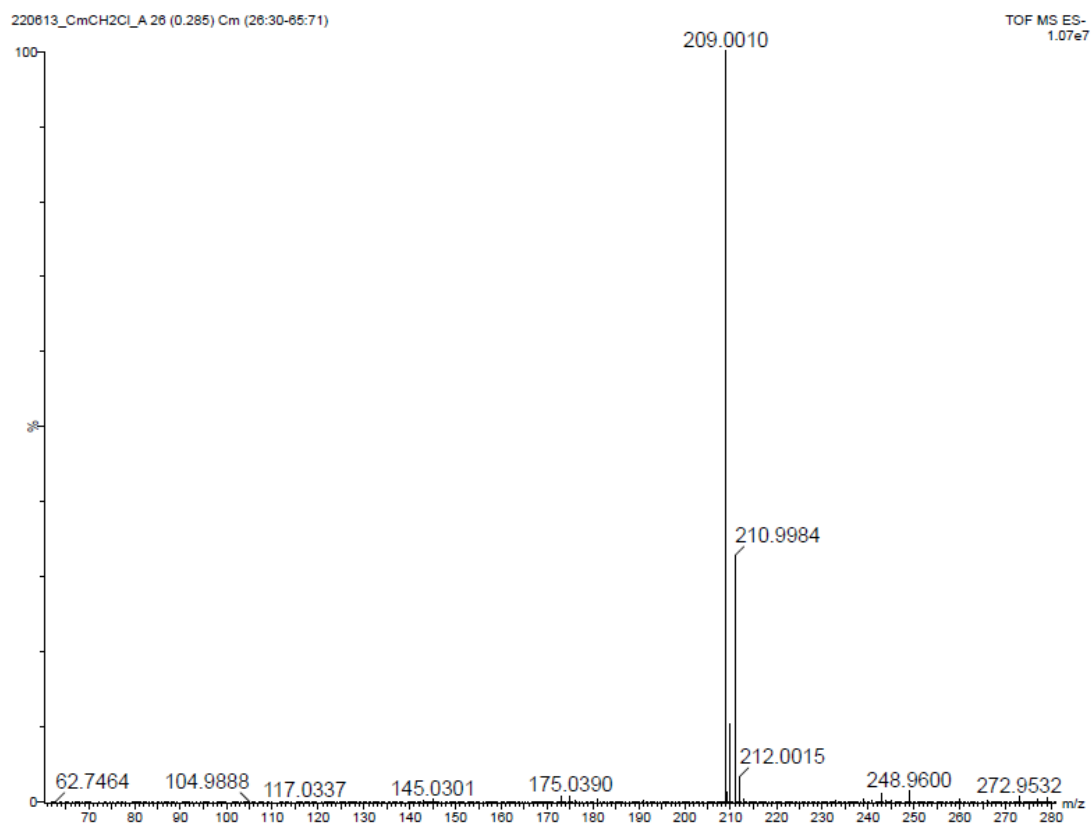

**Figure S8.** HRMS spectrum of CmCH<sub>2</sub>Cl

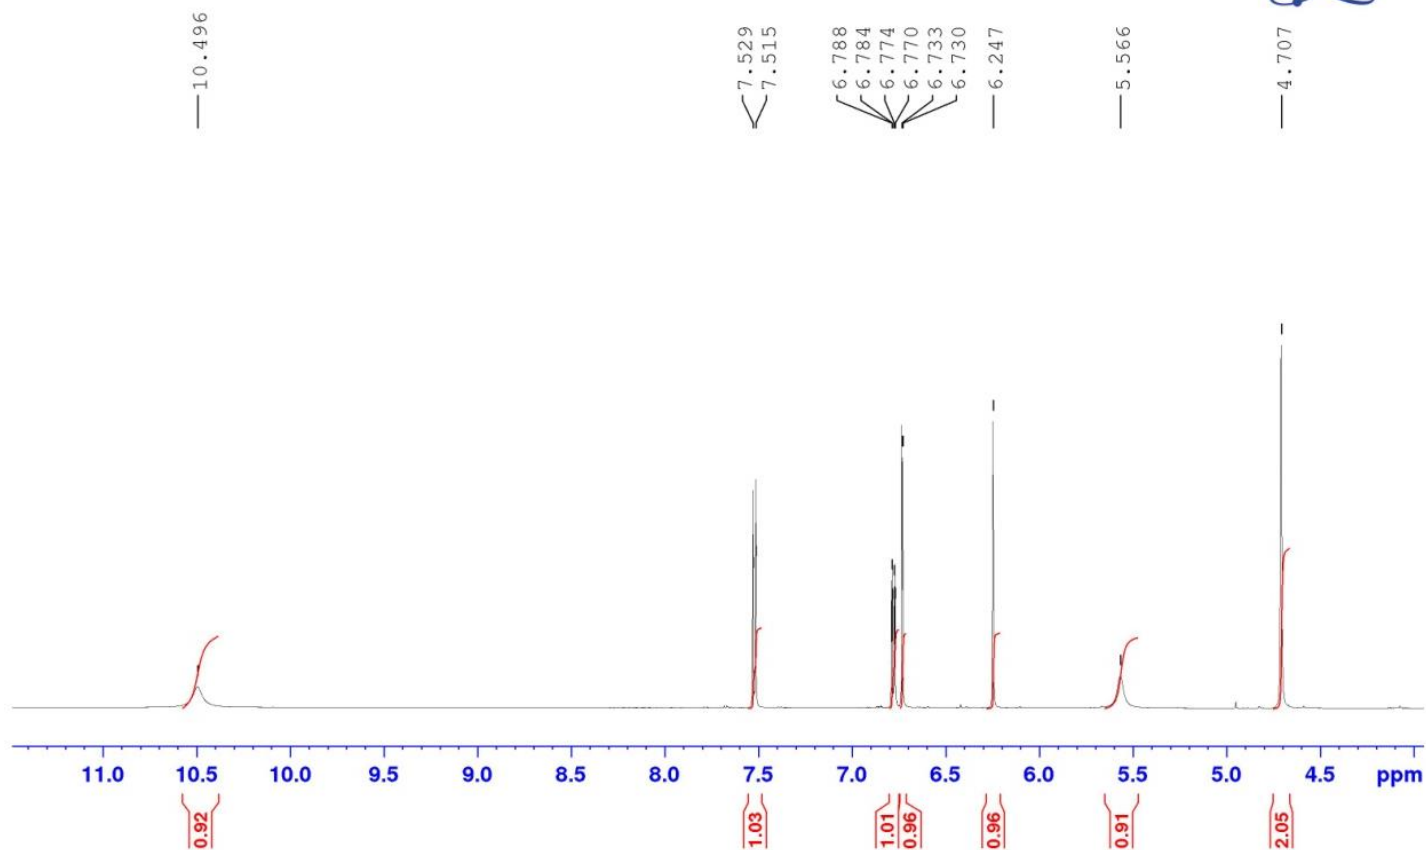

**Figure S9.**  $^1\text{H}$  NMR spectrum of  $\text{CmCH}_2\text{OH}$

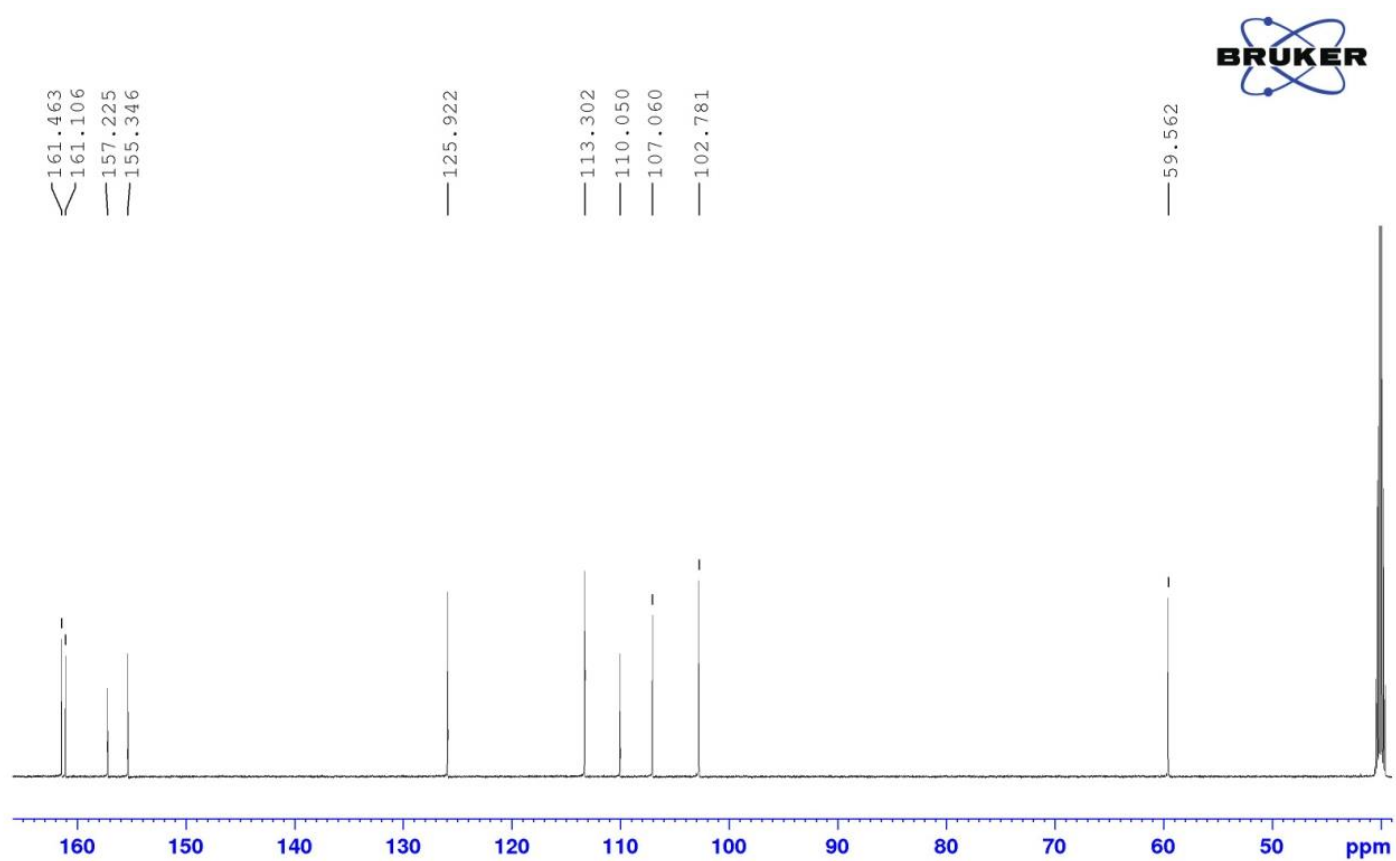

**Figure S10.**  $^{13}\text{C}$  NMR spectrum of **CmCH<sub>2</sub>OH**

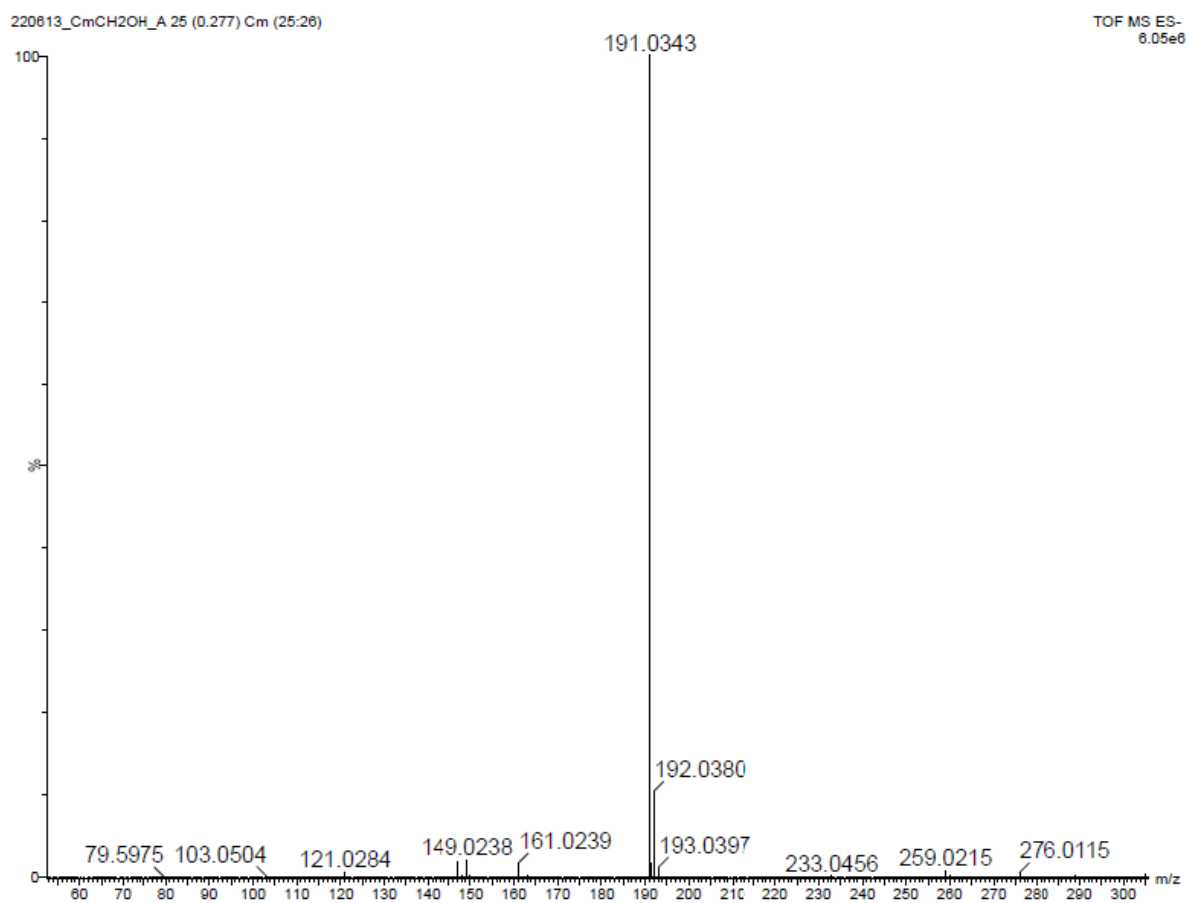

**Figure S11.** HRMS spectrum of **CmCH<sub>2</sub>OH**

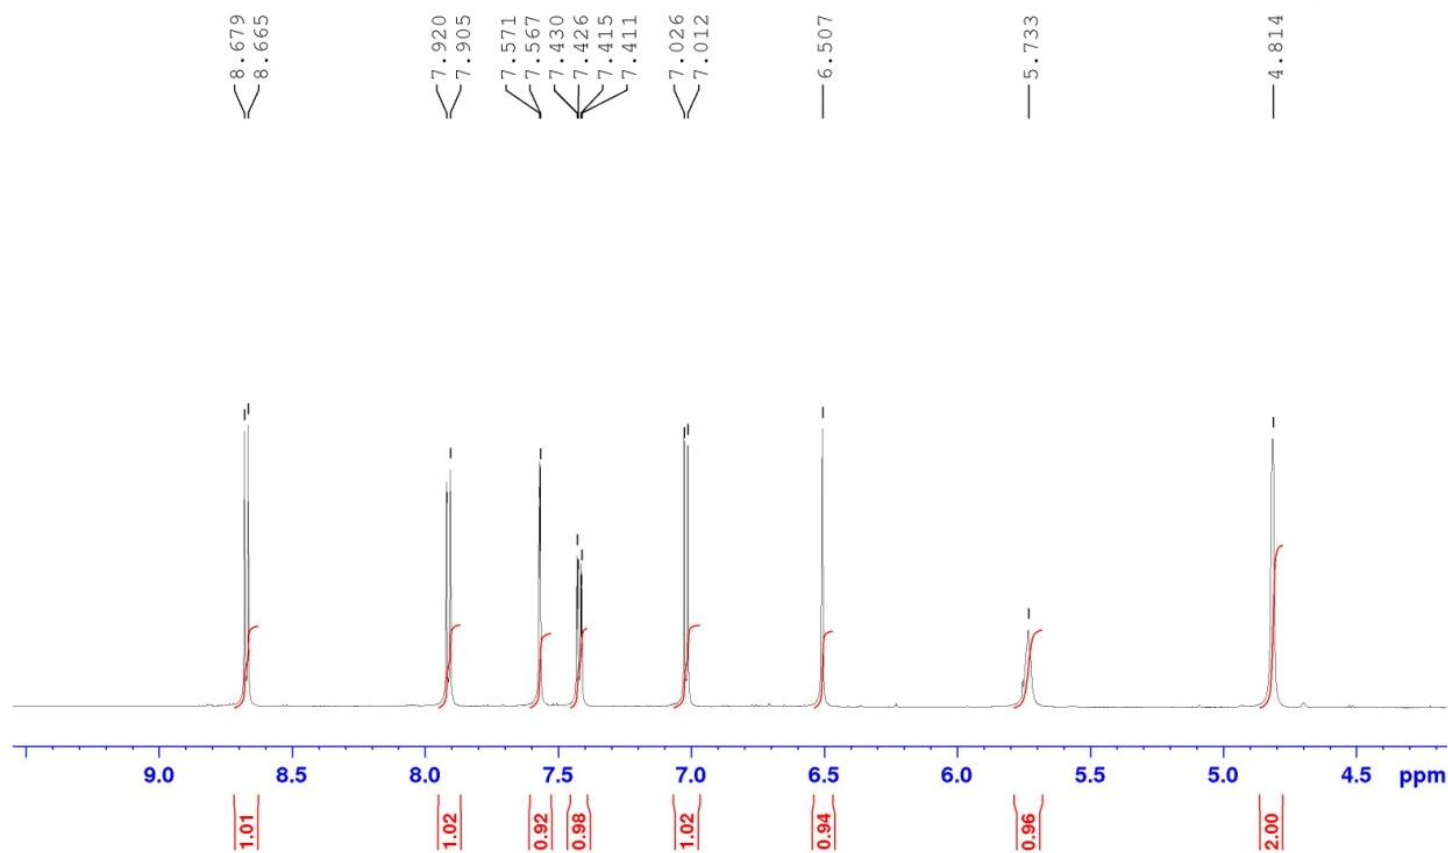

**Figure S12.**  $^1\text{H}$  NMR spectrum of NBD-O-CmCH<sub>2</sub>OH

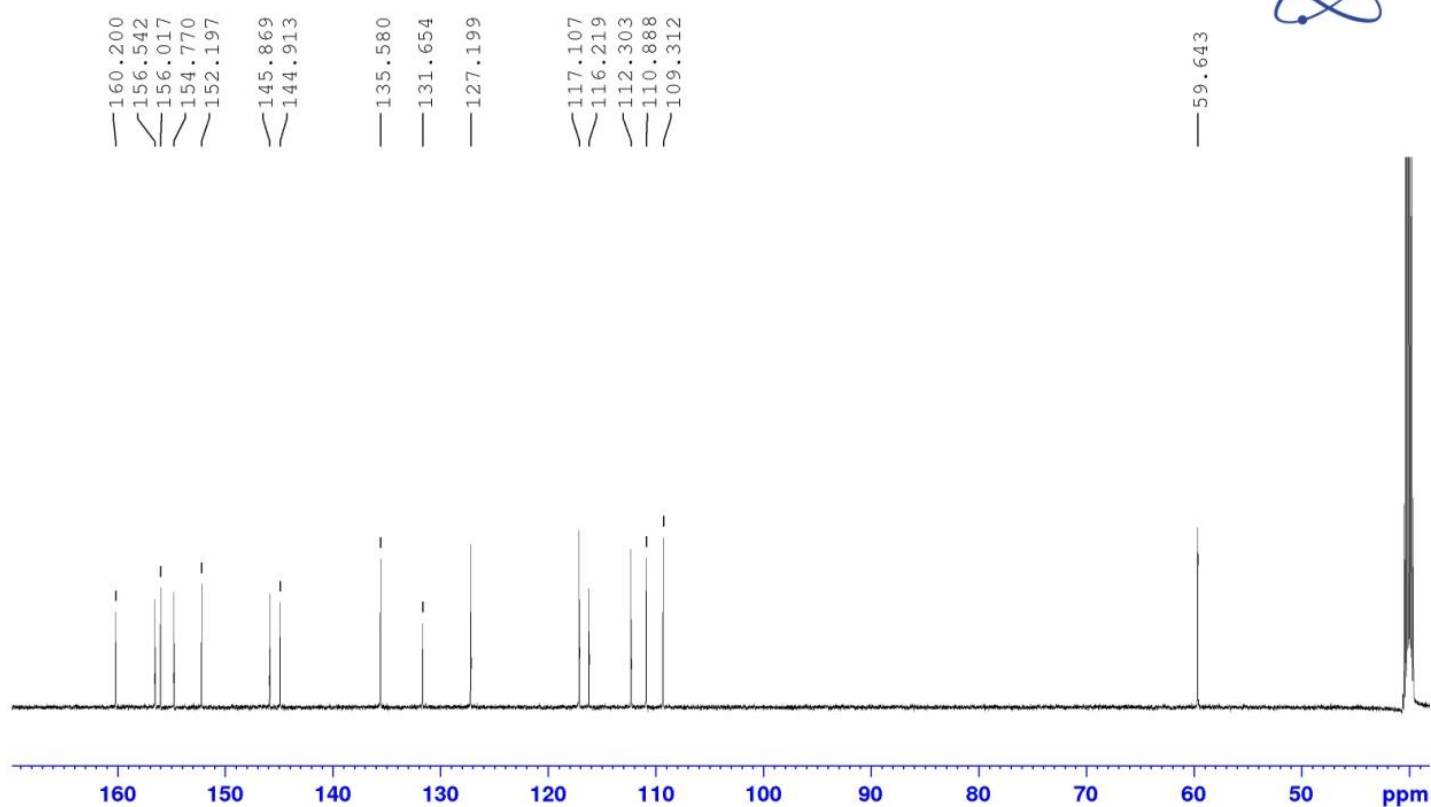

**Figure S13.**  $^{13}\text{C}$  NMR spectrum of NBD-O-CmCH<sub>2</sub>OH

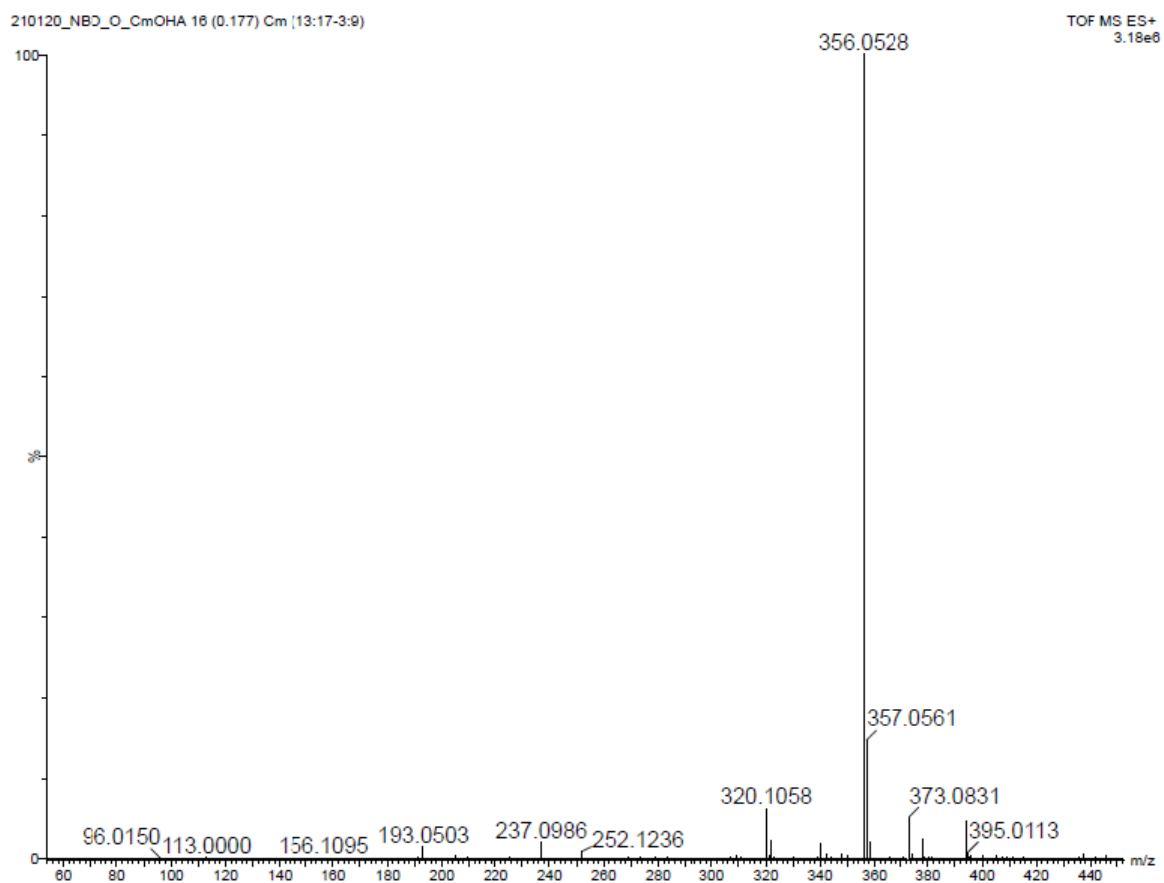

**Figure S14.** HRMS spectrum of NBD-O-CmCH<sub>2</sub>OH



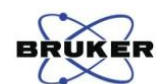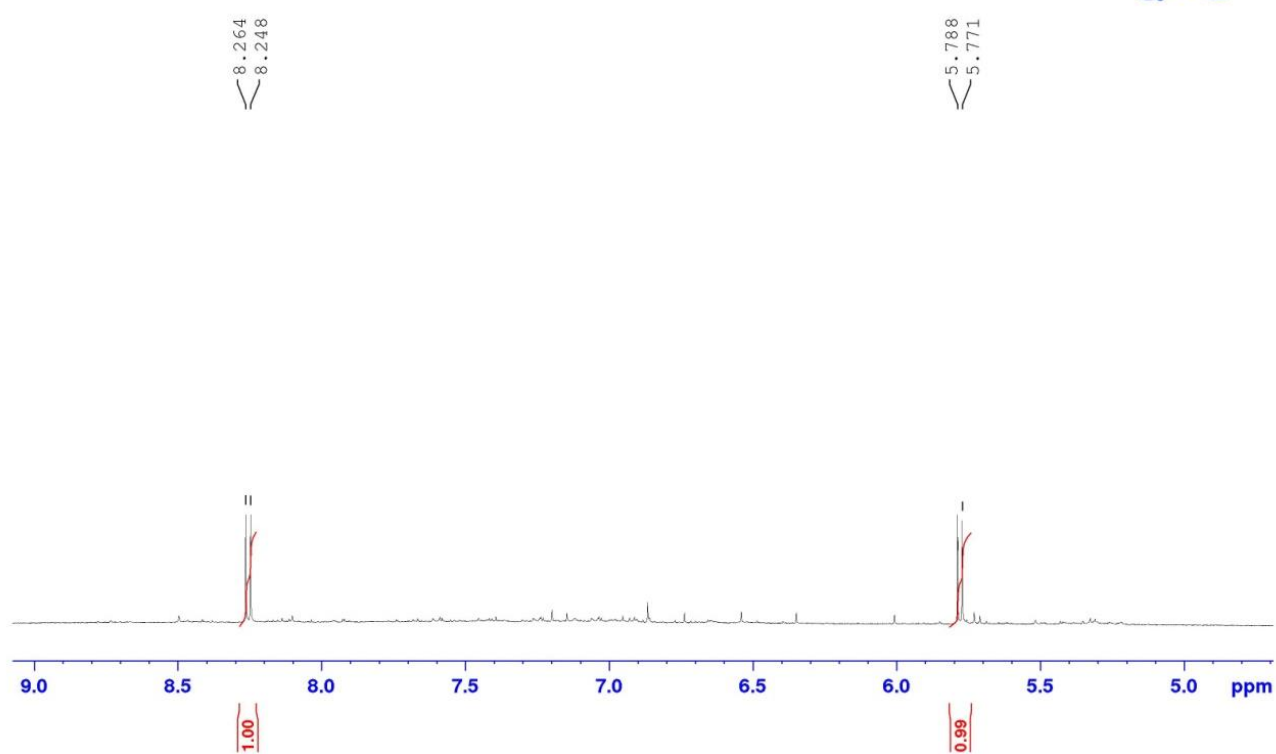

**Figure S15.**  $^1\text{H}$  NMR spectrum of NBD-SH

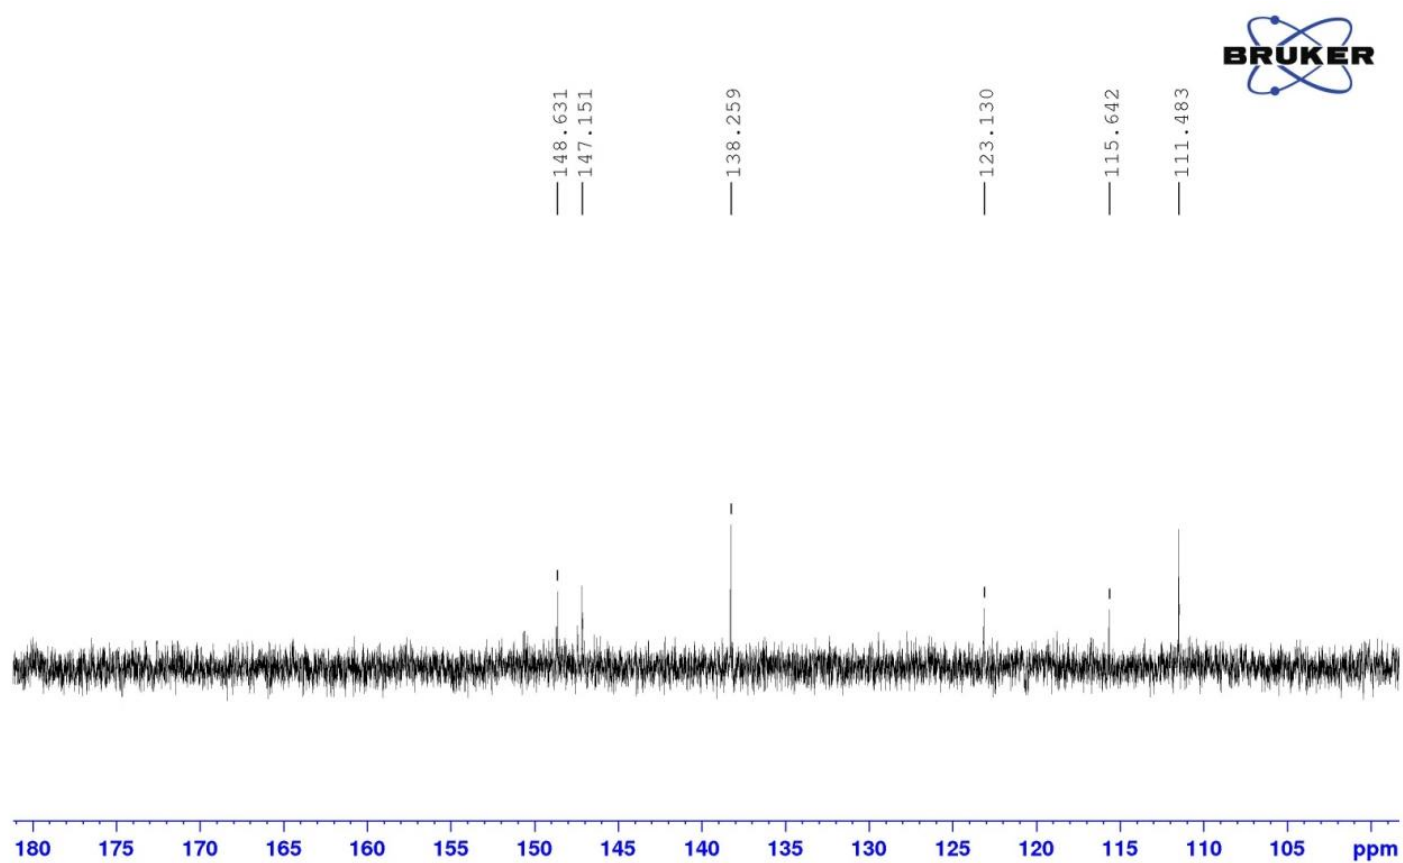

**Figure S16.** <sup>13</sup>C NMR spectrum of NBD-SH

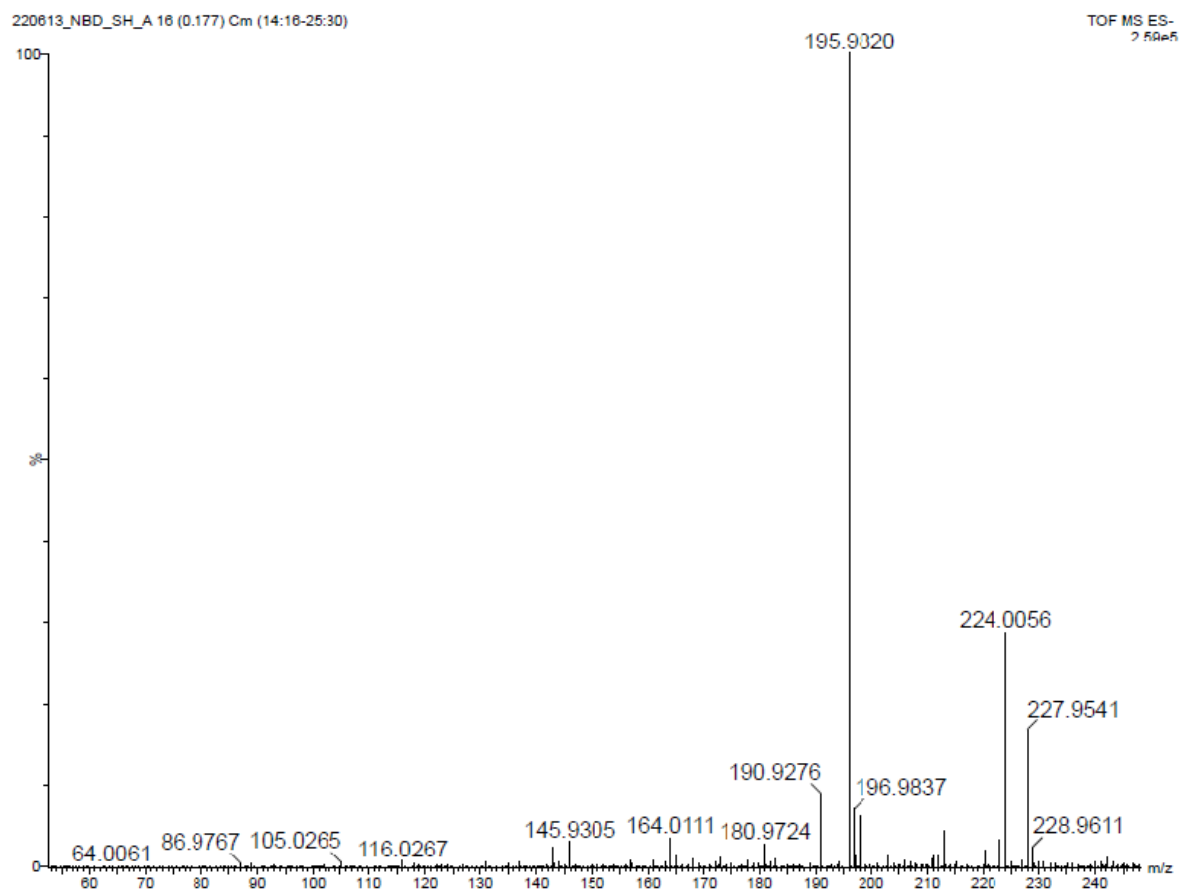

**Figure S17.** HRMS spectrum of **NBD-SH**

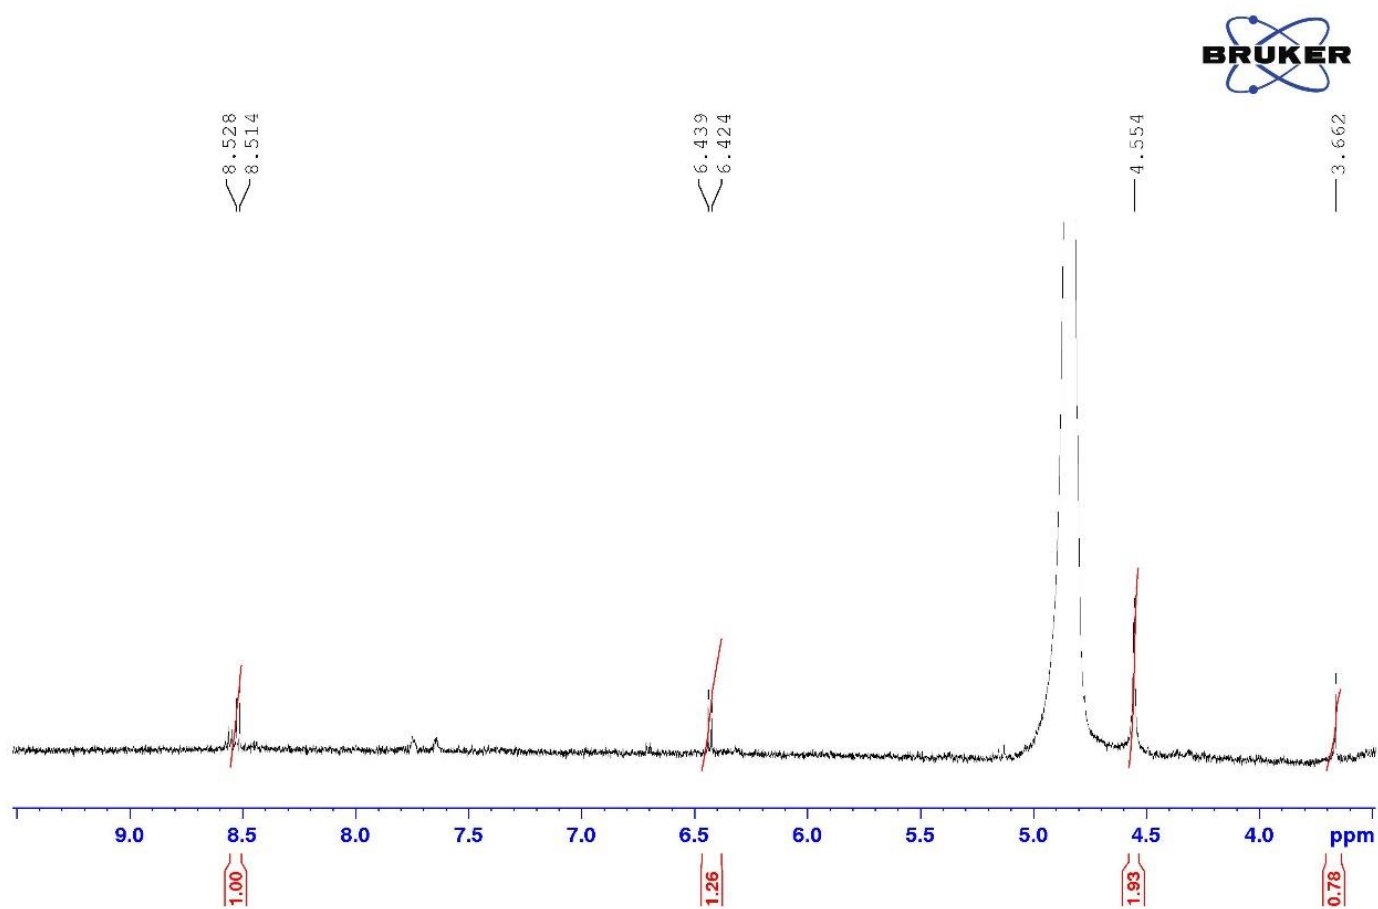

**Figure S18.**  $^1\text{H}$  NMR spectrum of NBD-Cys

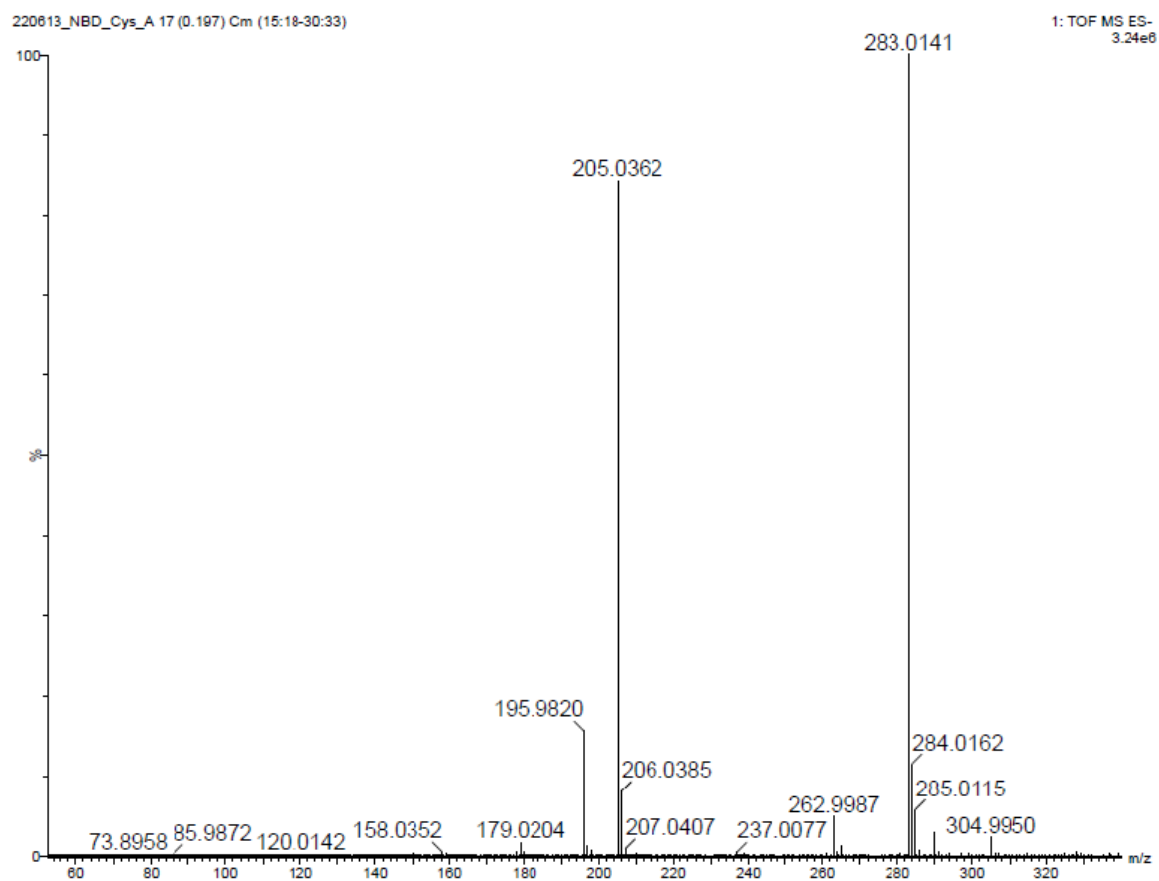

**Figure S19.** HRMS spectrum of NBD-Cys

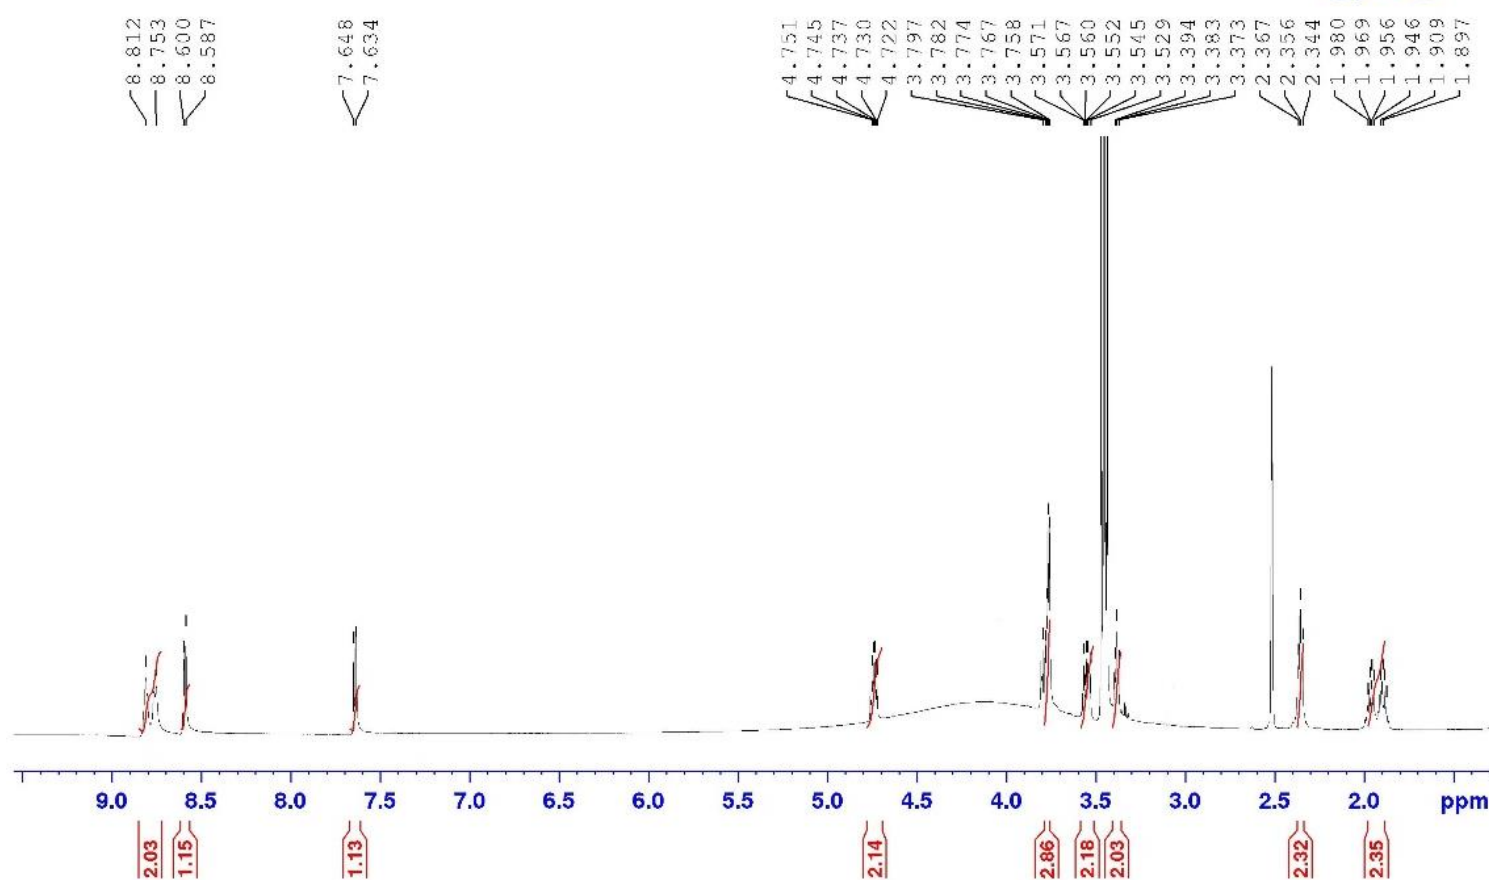

**Figure S20.**  $^1\text{H}$  NMR spectrum of NBD-GSH

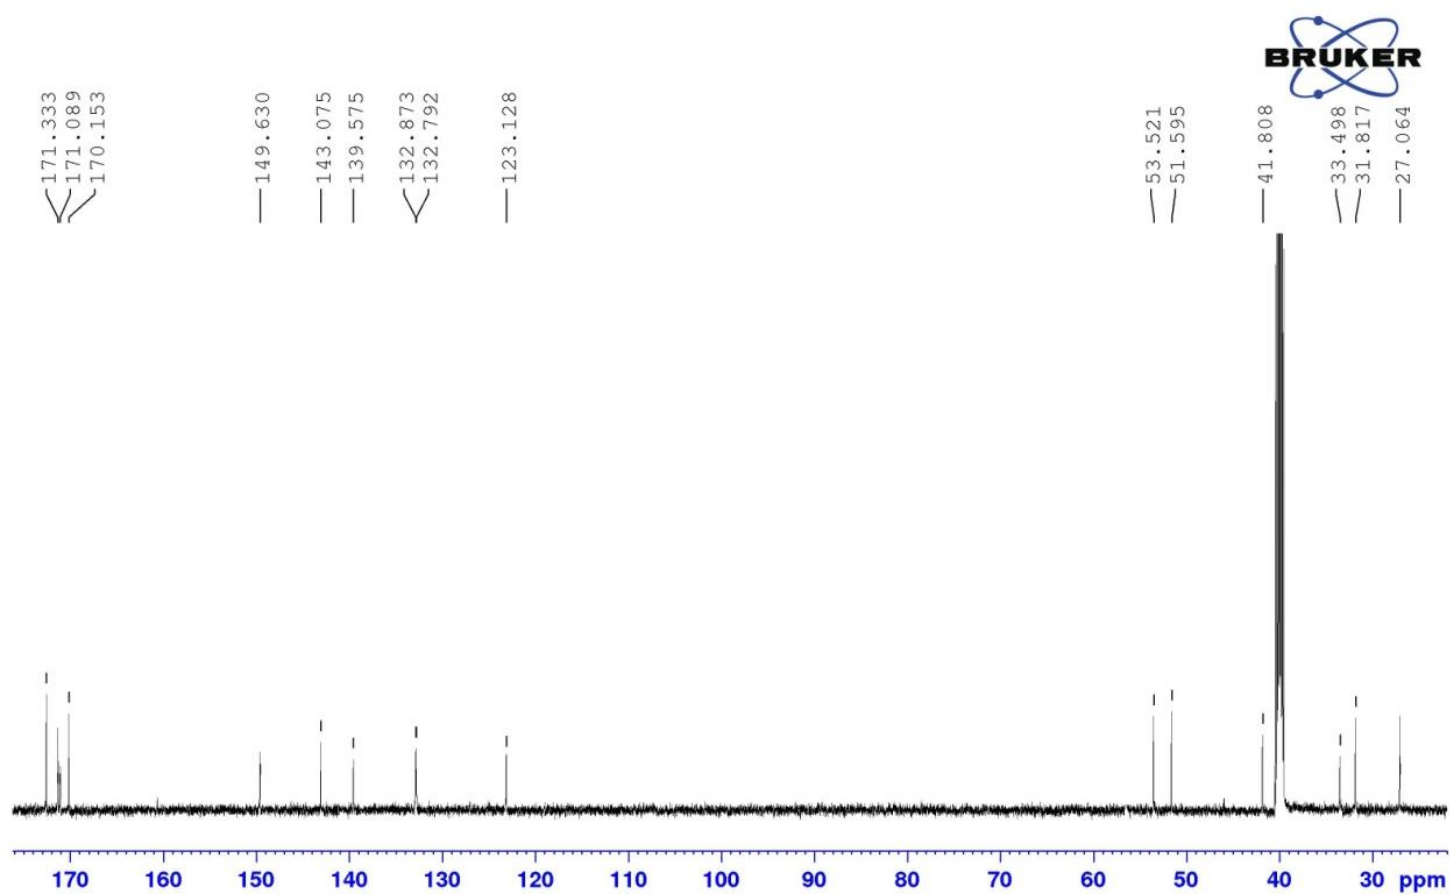

**Figure S21.**  $^{13}\text{C}$  NMR spectrum of NBD-GSH

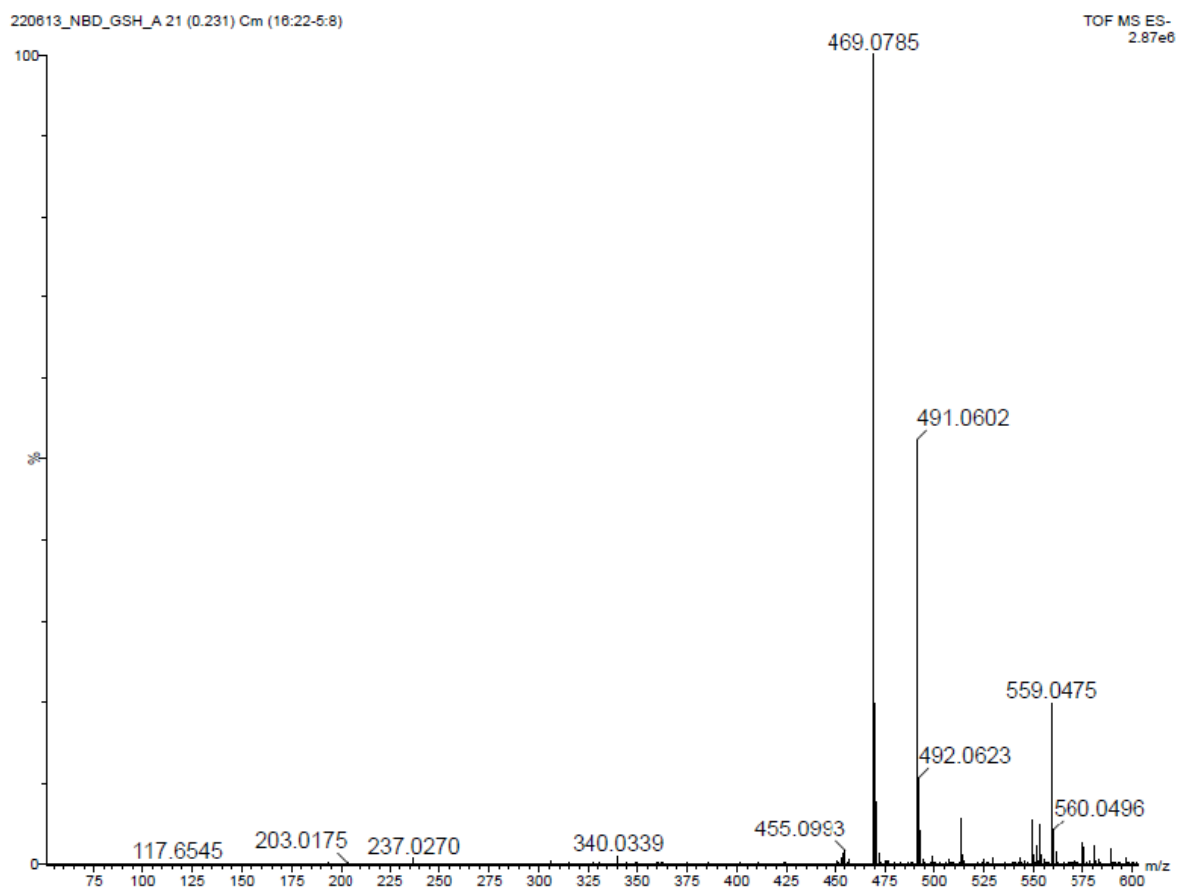

**Figure S22.** HRMS spectra of **NBD-GSH**



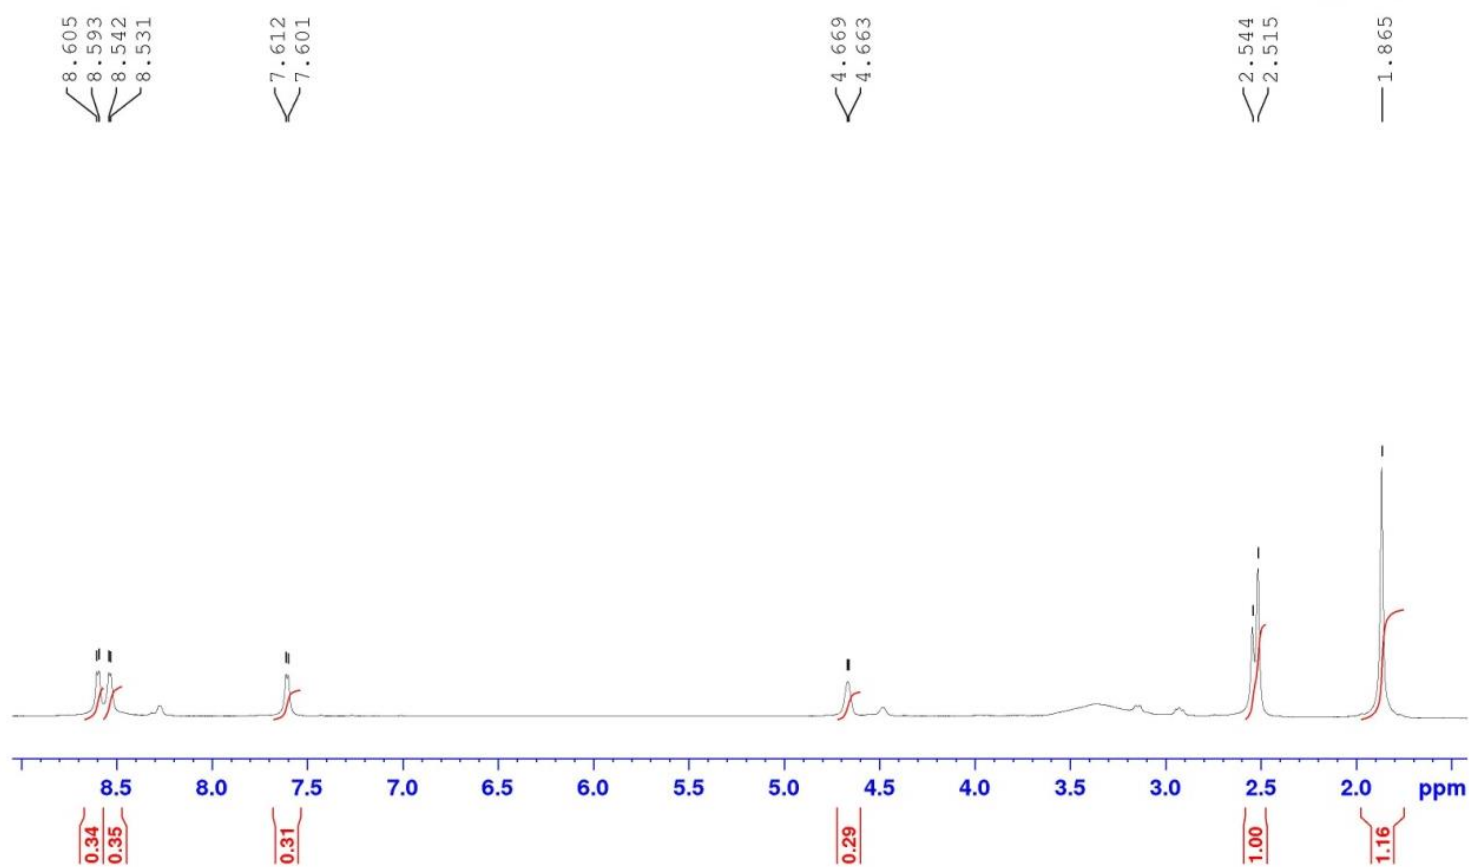

**Figure S23.**  $^1\text{H}$ NMR spectrum of NBD-NAC

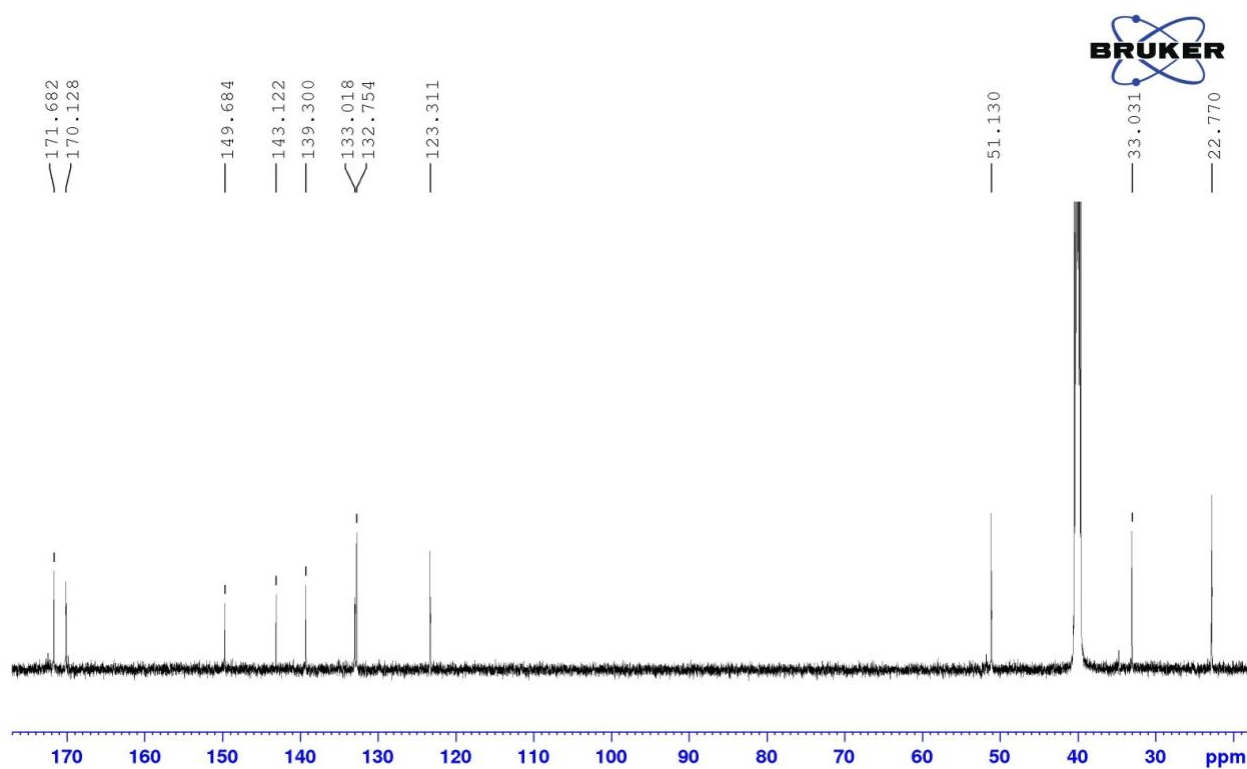

**Figure S24.** <sup>13</sup>C NMR spectrum of NBD-NAC

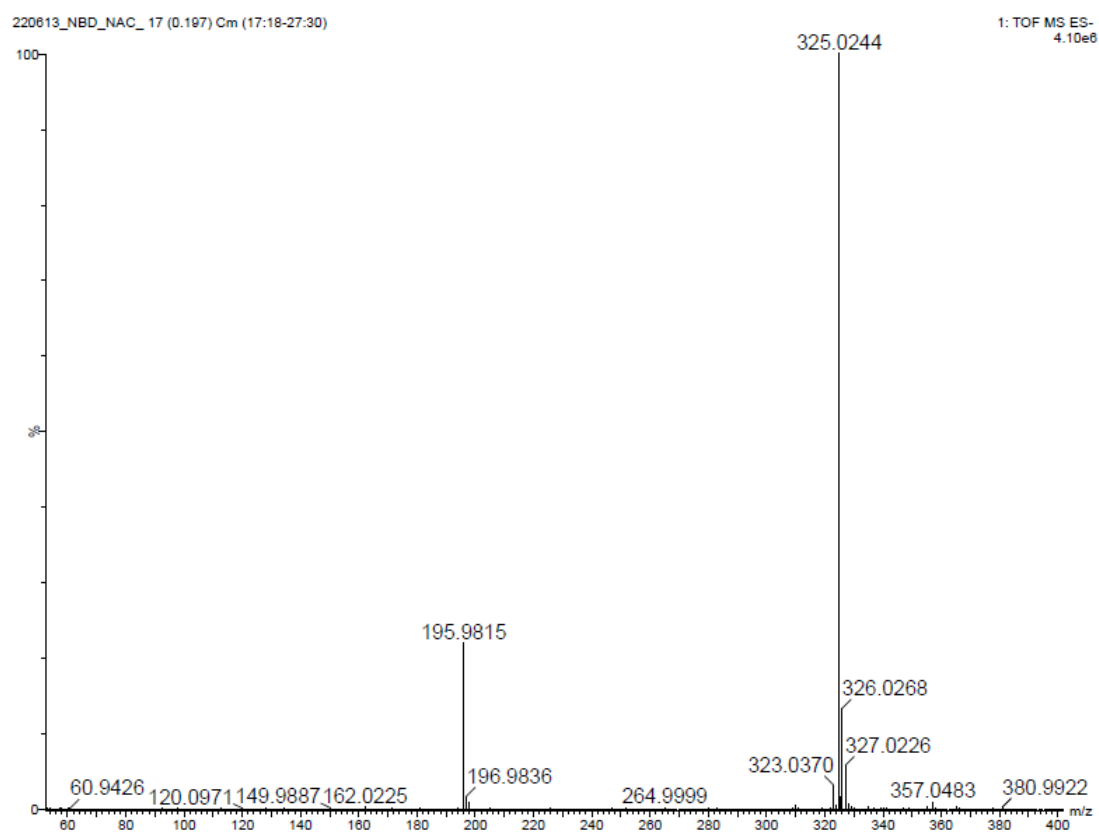

**Figure S25.** HRMS spectrum of NBD-NAC

- [S1] Zhang, Y.; Wang, J.; Yue, J.; Chao, J.; Huo, F.; Yin, C. A new strategy for the fluorescence discrimination of Cys/Hcy and GSH/H<sub>2</sub>S simultaneously colorimetric detection for H<sub>2</sub>S. *Spectrochim. Acta - A: Mol. Biomol.* **2020**, *227*, 117537.
- [S2] Chen, W.; Luo, H.; Liu, X.; Foley J. W.; Song, X. Broadly applicable Strategy for the fluorescence based detection and differentiation of glutathione and cysteine/homocysteine: demonstration in vitro and in vivo. *Anal. Chem.* **2016**, *88*, 3638-3646.
- [S3] Zhu, H.; Liu, C.; Yuan, R.; Wang, R.; Zhang, H.; Li, Z.; Jia, P.; Zhu, B.; Sheng, W. A simple highly specific fluorescent probe for simultaneous discrimination of cysteine/homocysteine and glutathione/hydrogen sulfide in living cells and zebrafish using two separated fluorescence channels under single wavelength excitation. *Analyst* **2019**, *144*, 4258
- [S4] Liu, T.; Li, S.; Zhang, X.; Wang, J.; Deng, Y.; Sun, X.; Xing, Z.; Wu, R. A facile probe for fluorescence turn-on and simultaneous naked-eyes discrimination of H<sub>2</sub>S and biothiols (Cys and GSH) and its application. *J Fluoresc.* **2022**, *32*, 175-188.
- [S5] Hao, Y.; Zhang, Y.; Zhu, D.; Luo, L.; Chen, L.; Tang, Z.; Zeng, R.; Xu, M.; Chen, S. Dual-emission fluorescent probe for discriminative sensing of biothiols. *Chinese J. Anal. Chem.* **2022**, *50*, 100153.
- [S6] Yang, Y.; Xu, Z.; Han, L.; Fan, Y.; Qing, M.; Li, N.; Luo, H. A simple fluorescent probe with two different fluorescence signals for rapid sequence distinguishing of Cys/Hcy/GSH and intracellular imaging. *Dyes and Pigments* **2021**, *184*, 108722.
- [S7] Xu, S.; Zhou, J.; Dong, X.; Zhao, W.; Zhu, Q. Fluorescent probe for sensitive discrimination of Hcy and Cys/GSH in living cells via dual-emission. *Anal. Chim. Acta.* **2019**, *1074*, 123-130.
- [S8] Niu, H.; Duan, Y.; Zhang, Y.; Hua, X.; Xu, C.; Li, Z.; Ma, J.; Qin, F.; Zhai, Y.; Ye, Y.; Zhao, Y. A bifunctional fluorescent probe based on PET & ICT for simultaneously recognizing Cys and H<sub>2</sub>S in living cells. *J. Photochem. Photobiol. B, Biol.* **2022**, *230*, 112441.
